# Supplementary material for: Placebo effects on cutaneous pain and itch: a systematic review and meta-analysis of experimental results and methodology
Source: PubMed Central journal article supplement (PMC10184563; doi:10.1097/j.pain.0000000000002820), 2022-11-16
Supplement: jop-164-1181-s001.pdf [file jop-164-1181-s001.pdf]

## Supplementary Digital Content

### Search strategy by database

#### **PubMed:**

("Placebo Effect"[Mesh] OR "Placebo effect"[Title/Abstract] OR "Placebo effects"[Title/Abstract] OR "Placebo response"[Title/Abstract] OR "Placebo responses"[Title/Abstract] OR "Placebo analgesia"[Title/Abstract] OR "Placebo analgesic"[Title/Abstract] OR "Nocebo Effect"[Mesh] OR Nocebo[Title/Abstract] OR Expectancy[Title/Abstract] OR Expectancies[Title/Abstract] OR "Conditioning (Psychology)"[Mesh:noexp] OR "Conditioning, Classical"[Mesh] OR "Conditioning, Operant"[Mesh] OR (conditioning[tiab] NOT medline[sb]) OR "Verbal Suggestion"[Title/Abstract] OR "Verbal Suggestions"[Title/Abstract]) **AND** ("Pain"[Mesh] OR "Analgesia"[Mesh] OR Pain[Title/Abstract] OR Nocicept\*[Title/Abstract] OR Analges\*[Title/Abstract] OR Hyperalges\*[Title/Abstract] OR Hypoalges\*[Title/Abstract] **OR** "pruritus"[Mesh:noexp] OR "antipruritics"[Mesh] OR Itch[Title/Abstract] OR Pruritus[Title/Abstract] OR Pruritic[Title/Abstract]) **NOT** ("animals"[Mesh] NOT "humans"[Mesh])

#### **PsycINFO**

(placebo/ OR conditioning/ OR classical conditioning/ OR (placebo effect OR placebo effects OR placebo response OR placebo responses OR placebo analgesia OR Nocebo OR Expectancy OR Expectancies OR conditioning OR verbal suggestion OR verbal suggestions).ti,ab.) **AND** (pain/ OR analgesia/ OR (pain OR analgesia OR analgesic OR hyperalgesia OR hyperalgesic OR hypoalgesia OR hypoalgesic OR itch OR pruritus OR pruritic).ti,ab.)

#### **EMBASE**

((placebo effect OR placebo effects OR placebo analgesia OR placebo response OR placebo responses OR nocebo OR Expectancies OR conditioning OR verbal suggestion OR verbal suggestions) **AND** (pain OR analgesia OR analgesic OR hyperalgesia OR hyperalgesic OR hypoalgesia OR hypoalgesic OR itch OR pruritus OR pruritic)).ti,ab. **NOT** ((nonhuman/ OR animal/) NOT human/)

#### **Cochrane CENTRAL Methodology Register**

([mh "Placebo Effect"] OR [mh ^"Conditioning (Psychology)"] OR [mh "Conditioning, Classical"] OR ("placebo effect" OR "placebo effects" OR "placebo analgesia" OR Nocebo OR expectancy OR expectancies OR conditioning OR "verbal suggestion" OR "verbal suggestions":ti,ab,kw)) **AND** ([mh Pain] OR [mh Analgesia] OR (pain OR analgesia OR analgesic OR hyperalgesia OR hyperalgesic OR hypoalgesia OR hypoalgesic OR itch OR pruritus OR pruritic:ti,ab,kw)) **NOT** ([mh animals] NOT [mh humans])

Example scoring of Risk of Bias form based on Marcuzzi et al., 2013

LOW 5/34

**Appendix B – Risk of bias assessment tool**

| CRITERIA                                                                                                     | YES | NO | UNCLEAR | NA* |
|--------------------------------------------------------------------------------------------------------------|-----|----|---------|-----|
| <b>Inclusion/exclusion criteria comprise clear information about:</b>                                        |     |    |         |     |
| Duration of pain (stage i.e. acute, subacute)                                                                | ✓   |    |         |     |
| Age of participants included (cut-off)                                                                       | ✓   |    |         |     |
| Diagnosis description                                                                                        |     |    |         | ✓   |
| <b>Final decision: Were inclusion/exclusion criteria clearly specified?</b>                                  | ✓   |    |         |     |
| Comment:                                                                                                     |     |    |         |     |
| <b>Clinical/demographical characteristics include full information about:</b>                                |     |    |         |     |
| Sample size                                                                                                  | ✓   |    |         |     |
| Mean age of participants                                                                                     |     | ✓  |         |     |
| Gender percentages                                                                                           | ✓   |    |         |     |
| Mean pain duration at time of assessment(s)                                                                  | ✓   |    |         |     |
| Mean pain intensity at time of assessment(s)                                                                 | ✓   |    |         |     |
| <b>Final decision: Were clinical/demographical variables fully described?</b>                                | ✓   |    |         |     |
| Comment:                                                                                                     |     |    |         |     |
| <b>The recruitment procedure include information about:</b>                                                  |     |    |         |     |
| Clinical setting(s)                                                                                          |     |    |         | ✓   |
| How patients have been recruited (e.g. consecutive, convenience sample)                                      | ✓   |    |         |     |
| Controls/comparators recruitment                                                                             |     |    |         | ✓   |
| <b>Final decision: Was recruitment procedure specified and appropriate?</b>                                  | ✓   |    |         |     |
| Comment:                                                                                                     |     |    |         |     |
| <b>Somatosensory assessment:</b>                                                                             |     |    |         |     |
| <b>Was method used to assess somatosensory function standardized or validated?</b>                           | ✓   |    |         |     |
| Comment:                                                                                                     |     |    |         |     |
| <b>Method of somatosensory assessment include information about:</b>                                         |     |    |         |     |
| Number of examiner involved in the assessment (where appropriate)                                            |     | ✓  |         |     |
| Equipment/tool used                                                                                          | ✓   |    |         |     |
| Comprehensive description of the procedure (where appropriate)                                               | ✓   |    |         |     |
| Number of assessments                                                                                        | ✓   |    |         |     |
| Assessment sites                                                                                             | ✓   |    |         |     |
| <b>Final decision: Was somatosensory assessment fully described?</b>                                         | ✓   |    |         |     |
| Comment:                                                                                                     |     |    |         |     |
| <b>Blinding of assessment:</b>                                                                               |     |    |         |     |
| <b>Were examiners who carried out somatosensory assessment blinded to participant group or condition?</b>    |     |    | ✓       |     |
| Comment:                                                                                                     |     |    |         |     |
| <b>Controlled risk of known confounders:</b>                                                                 |     |    |         |     |
| Confounders known to influence somatosensory assessment were evaluated                                       | ✓   |    |         |     |
| A description of how confounders have been handled was provided                                              | ✓   |    |         |     |
| <b>Final decision: Were factors known to influence somatosensory assessment evaluated or controlled for?</b> | ✓   |    |         |     |
| Comment:                                                                                                     |     |    |         |     |

No points

No points

2 points

Not noted  
1 point

\*NA: not applicable

**Figure S1**

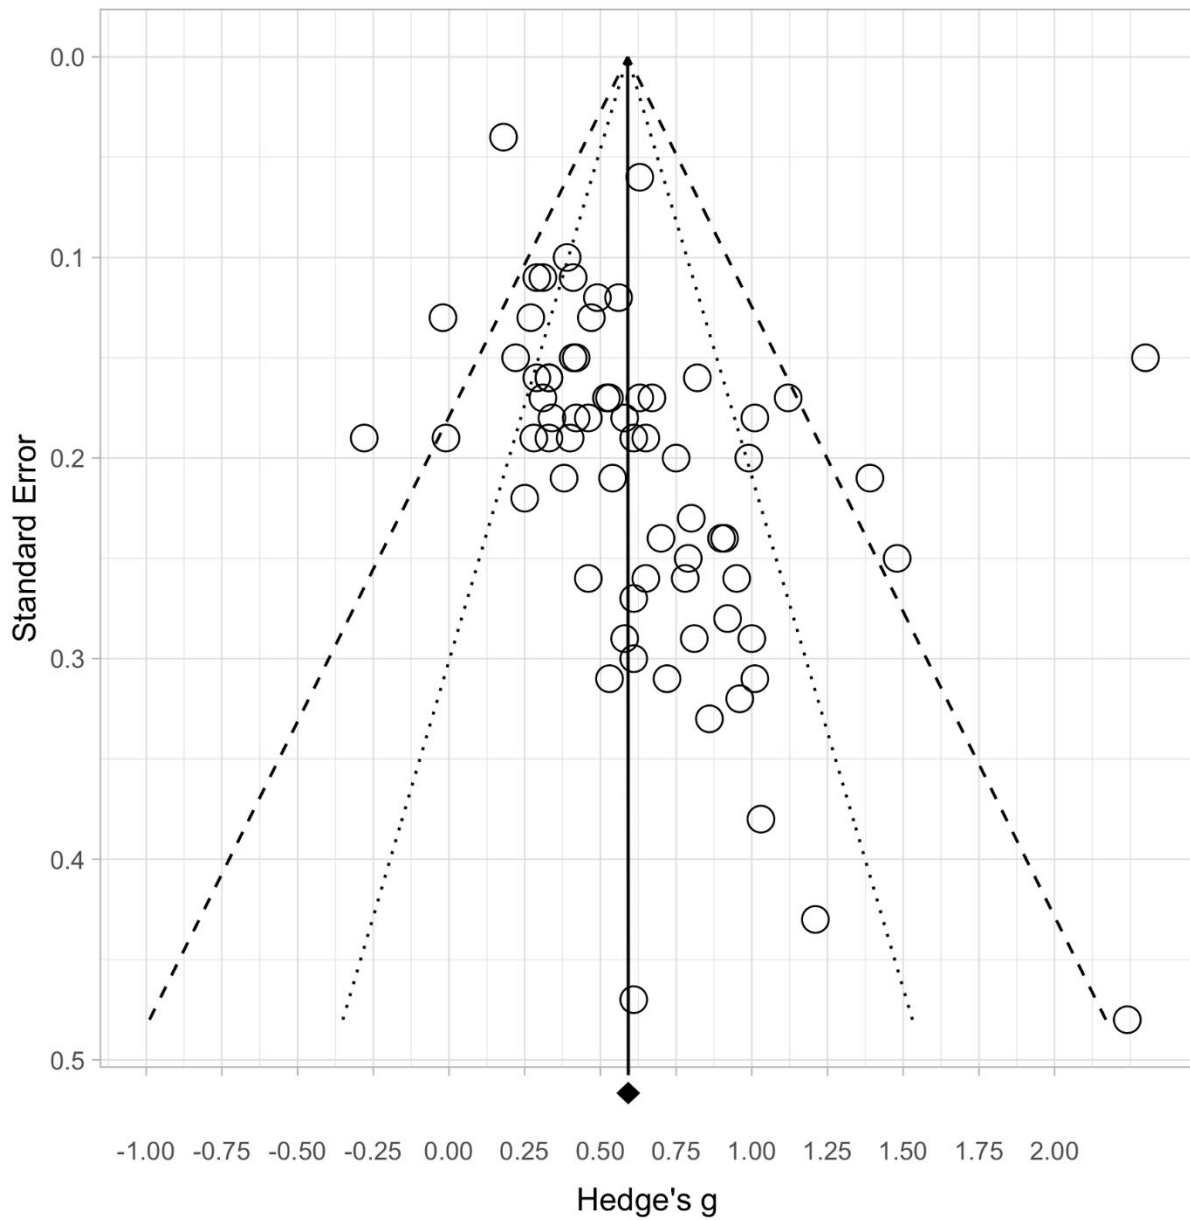

*Note.* Funnel plot of studies included in the pain classical conditioning with verbal suggestion meta-analysis. Outer, dashed line indicates a 95% confidence interval. Inner, dotted line indicates a 99% confidence interval.

Figure S2

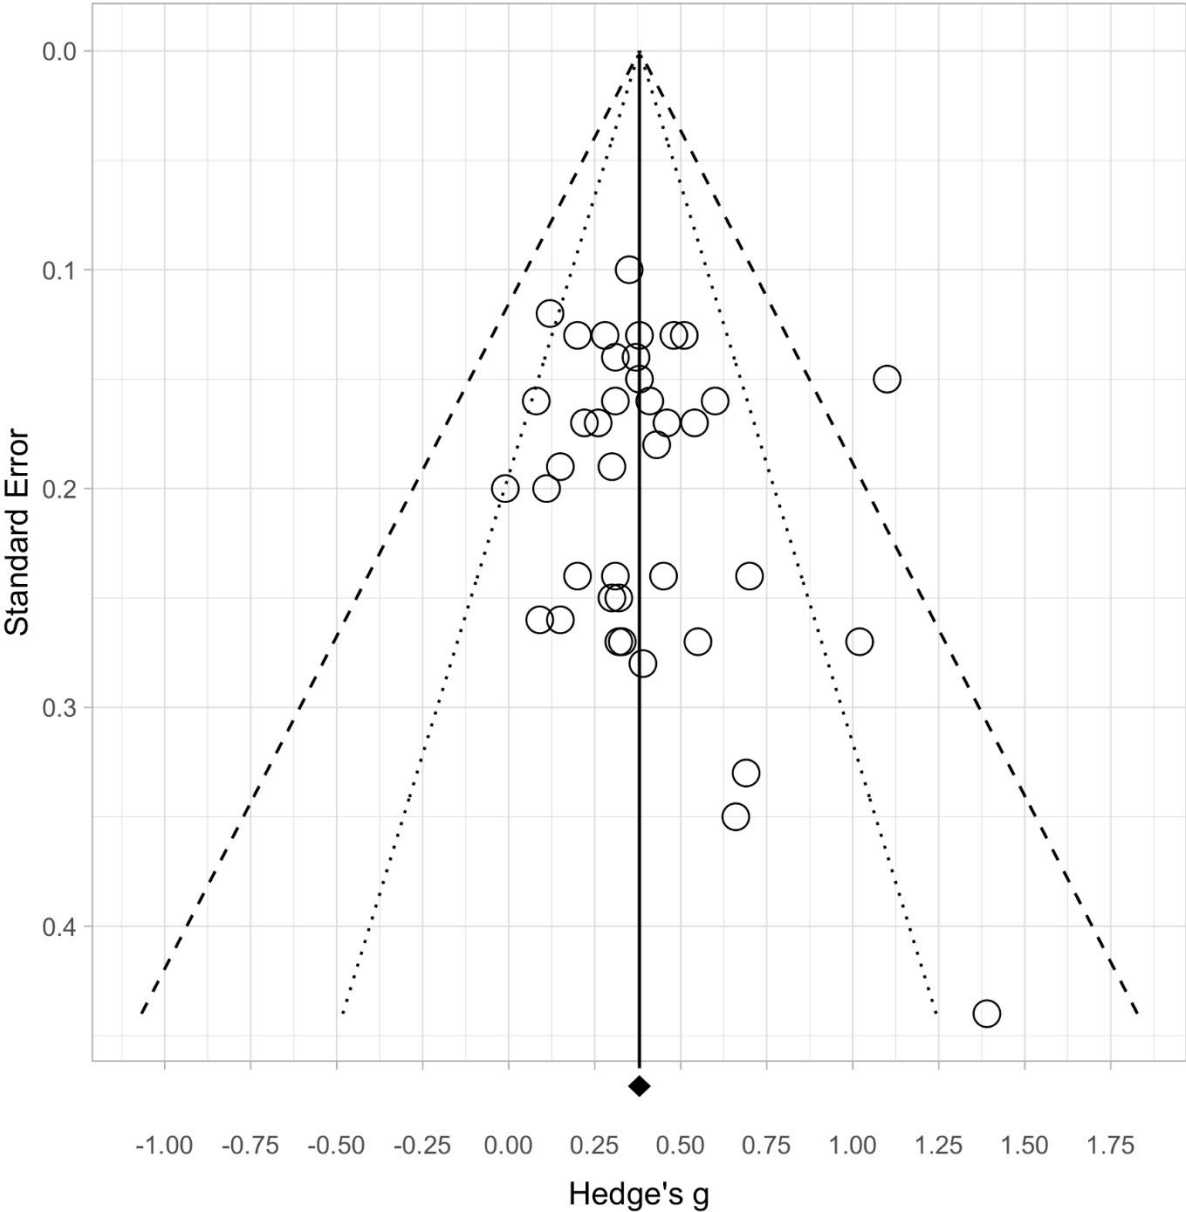

*Note.* Funnel plot of studies included in the pain verbal suggestion meta-analysis. Outer, dashed line indicates a 95% confidence interval. Inner, dotted line indicates a 99% confidence interval.

**Figure S3**

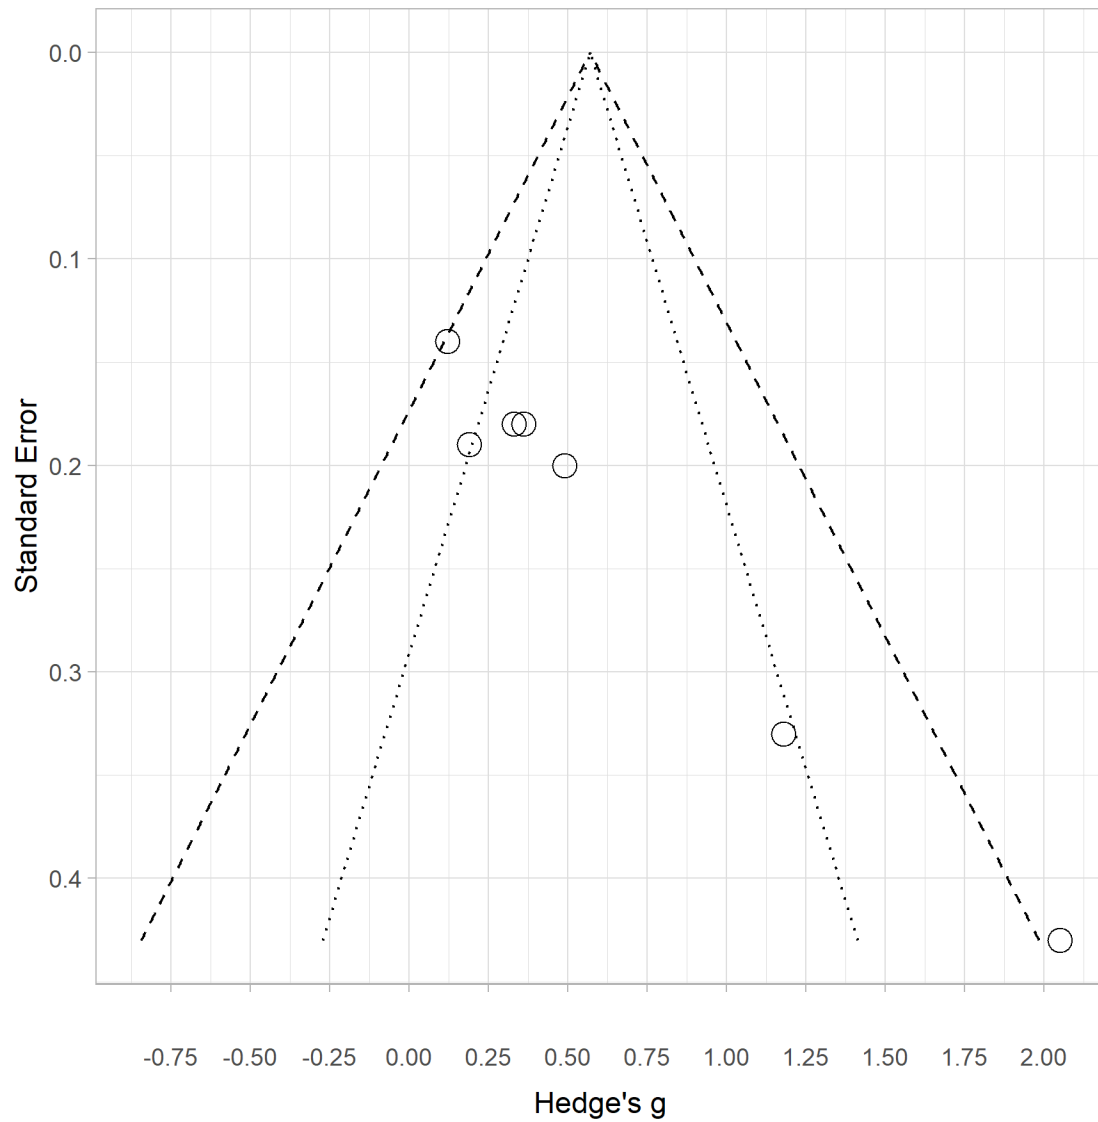

*Note.* Funnel plot of studies included in the pain observational learning meta-analysis. Outer, dashed line indicates a 95% confidence interval. Inner, dotted line indicates a 99% confidence interval.

**Figure S4**

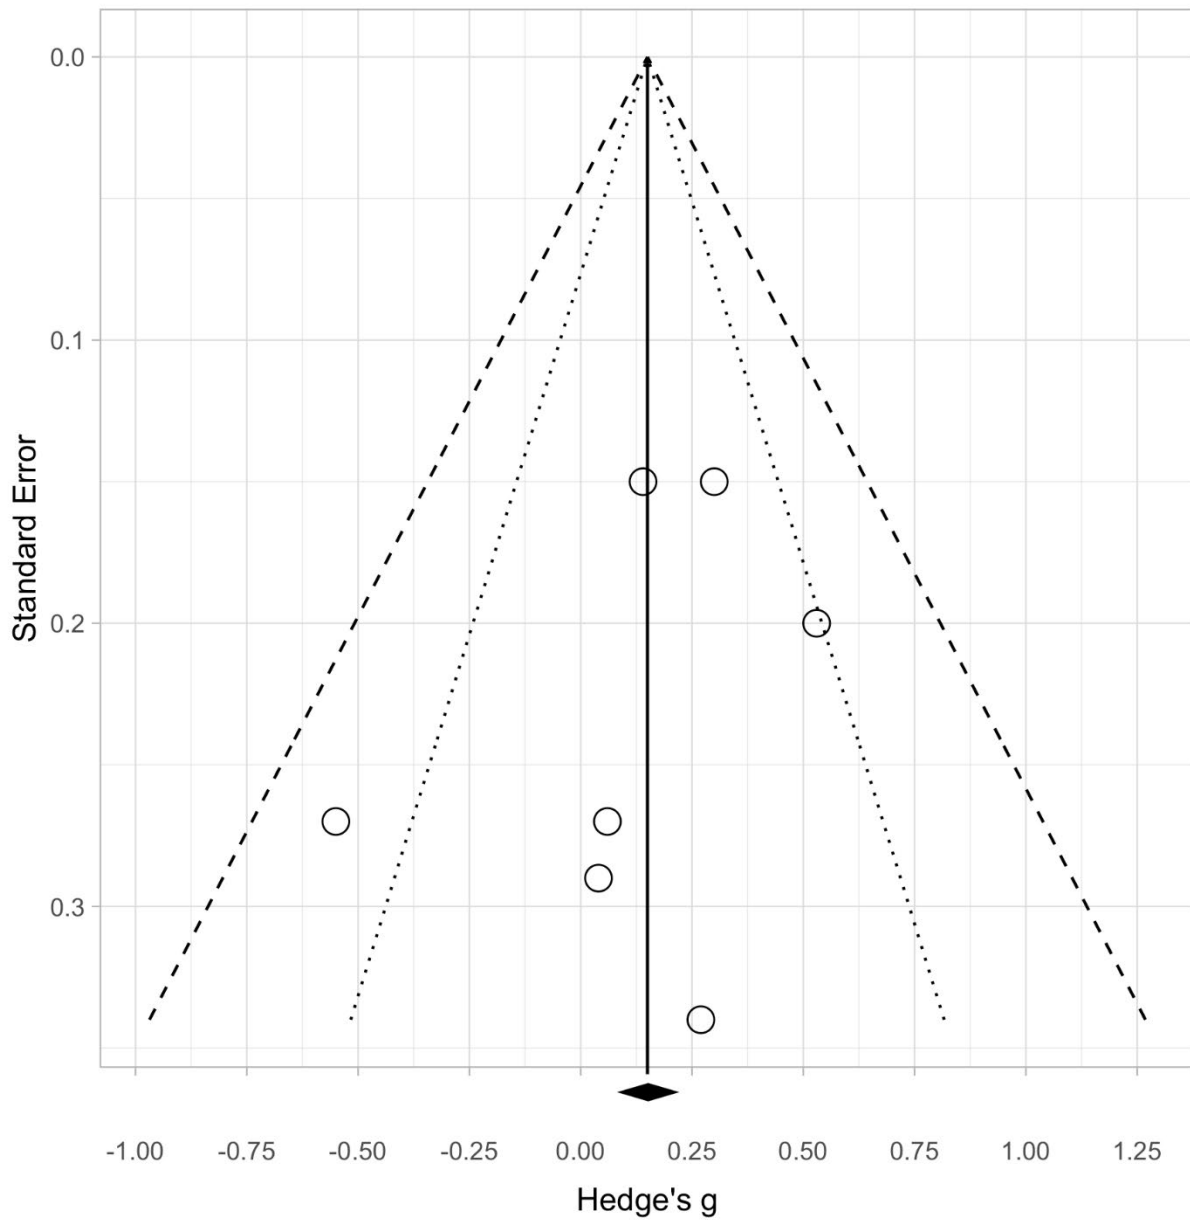

*Note.* Funnel plot of studies included in the itch verbal suggestion meta-analysis. Outer, dashed line indicates a 95% confidence interval. Inner, dotted line indicates a 99% confidence interval.
